# Supplementary material
Source: Springer Nature journal article supplement (https://www.springermedizin.de/resource/supplementary/12882_2011_328_MOESM2_ESM.pdf/9453614)

## Haemoglobin, g/L

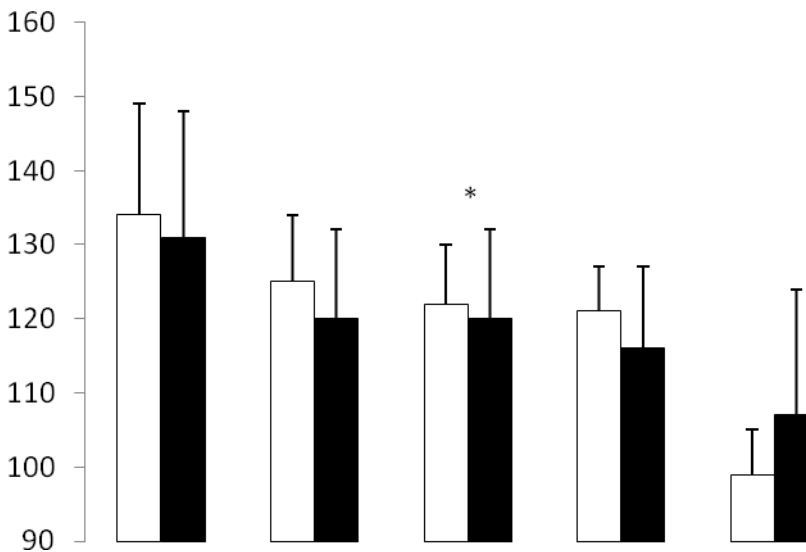

## ESA dosage, IU/kg/week

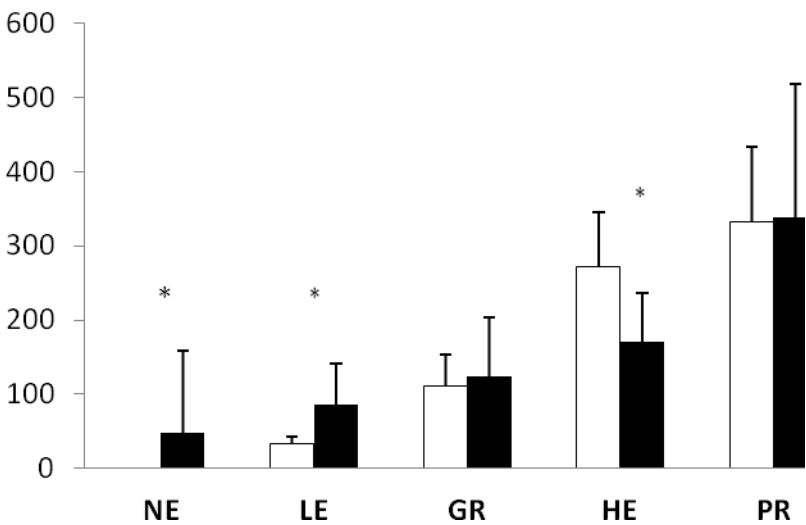

Supplement: MOESM2 [file 9453614]
